# Supplementary material for: NRF2-regulated metabolic gene signature as a prognostic biomarker in non-small cell lung cancer
Source: PubMed Central journal article supplement (PMC5642521; doi:10.18632/oncotarget.19349), 2017-07-18
Supplement: oncotarget-08-69847-s001.pdf [file oncotarget-08-69847-s001.pdf]

# NRF2-regulated metabolic gene signature as a prognostic biomarker in non-small cell lung cancer

## SUPPLEMENTARY MATERIALS

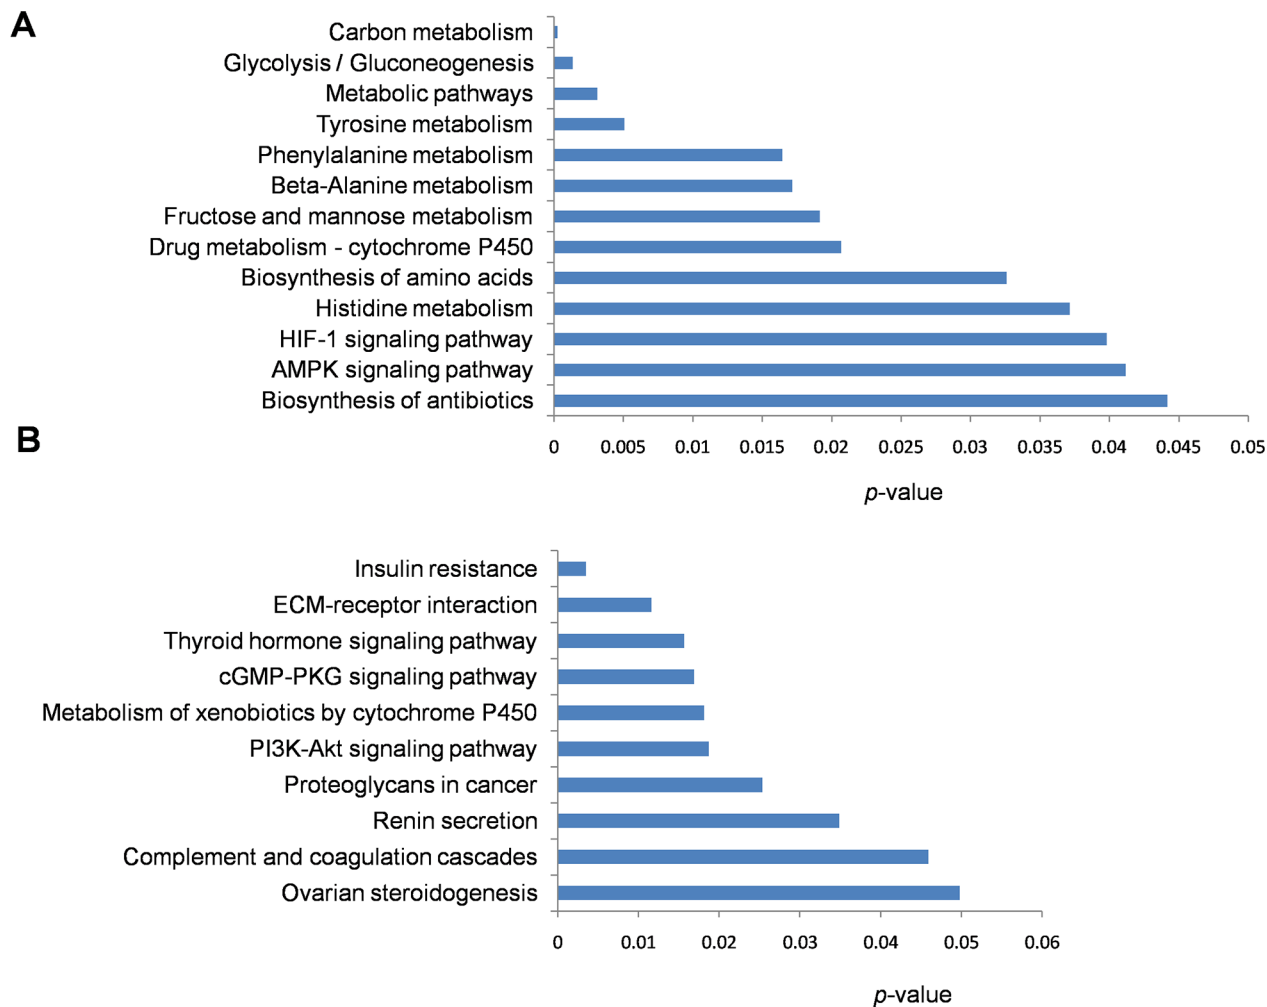

**Figure 1:** Histograms showing KEGG pathways ( $p < 0.05$ ) of downregulated genes identified from differentially-expressed genes of **(A)** KEAP1-overexpression and **(B)** NRF2-KD microarrays.

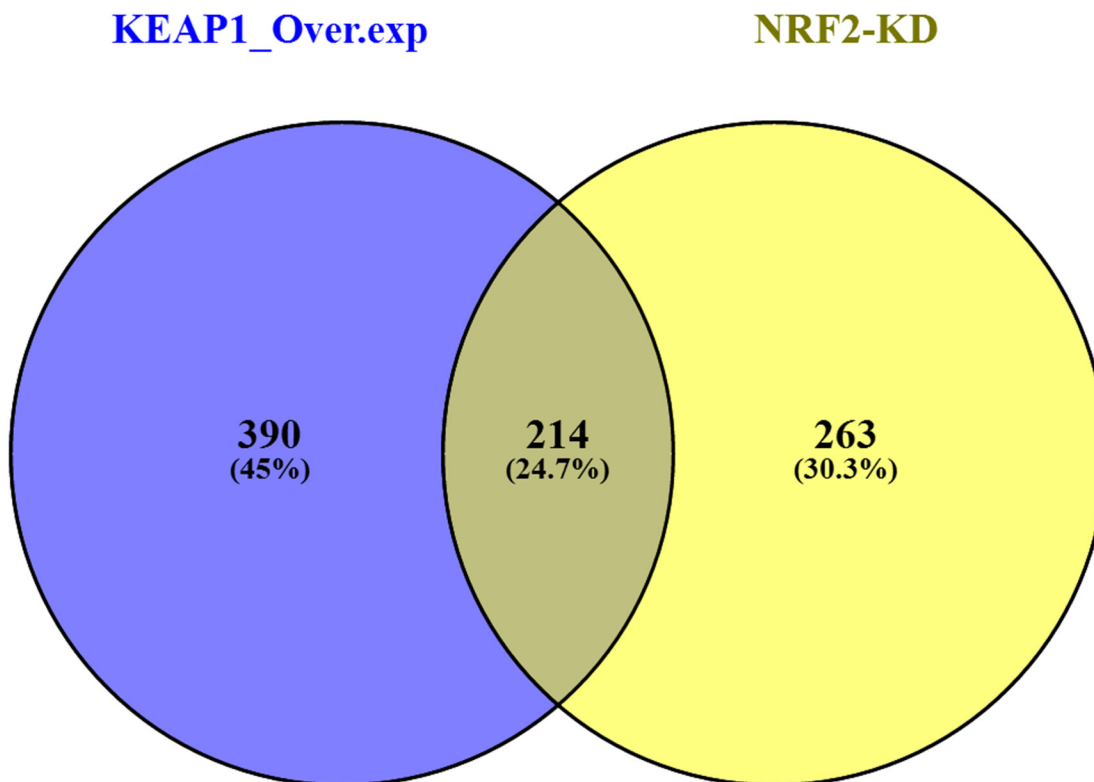

Figure 2: Venn diagram showing the genes overlapping between common NRF2-regulated genes identified from the combinatorial analysis of KEAP1 overexpression (KEAP1\_Over.exp) and NRF2-knockdown (NRF2-KD) downregulated gene microarray data with fold change >1.5.

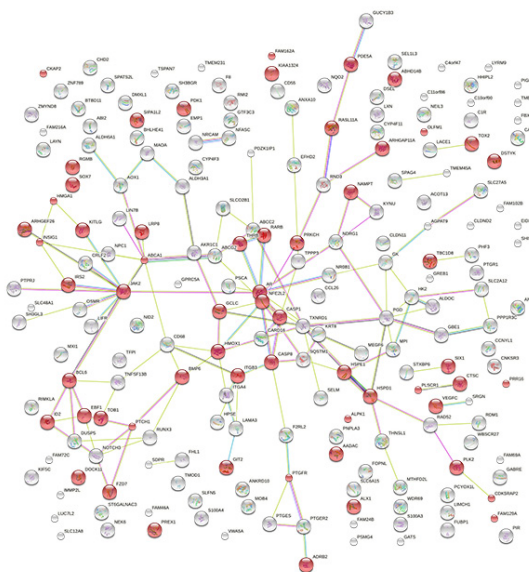

Figure 3: Protein-protein interaction network of downregulated genes identified from combinatorial analysis of both KEAP1-overexpression and NRF2-KD downregulated genes in A549 cells using STRING v10. Red, genes involved in GO enrichment: GO.0009893-positive regulation of metabolic process.

**Supplementary Table 1: List of down regulated genes in KEAP1 overexpression A549 cells (FC>1.5).**

**See Supplementary File 1**

**Supplementary Table 2: Functional annotation of KEAP1 overexpression microarray down regulated genes in A549 cells.**

**See Supplementary File 2**

**Supplementary Table 3: List of down regulated genes in NRF2 KD A549 cells (FC>1.5).**

**See Supplementary File 3**

**Supplementary Table 4: Functional annotation of NRF2 KD microarray down regulated genes in A549 cells.**

**See Supplementary File 4**

**Supplementary Table 5: List of down regulated genes in both KEAP1 overexpression and NRF2 KD A549 cells (FC>1.5).**

**See Supplementary File 5**

**Supplementary Table 6: List of genes identified in GO\_BP term- “small molecule metabolic process”.**

**See Supplementary File 6**

**Supplementary Table 7: List of NRF2-ARE/ARE like sequences in genes involved in metabolism.**

**See Supplementary File 7**

**Supplementary Table 8: List of human qRT PCR primers used for validation.**

**See Supplementary File 8**
